# Supplementary material for: All-in-one NIR-activated nanoplatforms for enhanced bacterial biofilm eradication
Source: Royal Society of Chemistry journal article supplement (doi:10.1039/c8nr04748k), 2018-01-01
Supplement: c8nr04748k1.pdf [file c8nr04748k1.pdf]

## **Supporting Information**

### **All-in-one NIR-activated nanoplatforms for enhanced bacterial biofilm eradication**

Xiaomei Dai, Yu Zhao, Yunjian Yu, Xuelei Chen, Xiaosong Wei, Xinge Zhang,\*

Chaoxing Li

<sup>a</sup> Key Laboratory of Functional Polymer Materials of Ministry of Education, Institute of Polymer Chemistry, College of Chemistry, Nankai University, Tianjin 300071, China

Tel: +86-22-23501645; Fax: +86-22-23505598

E-mail: zhangxinge@nankai.edu.cn

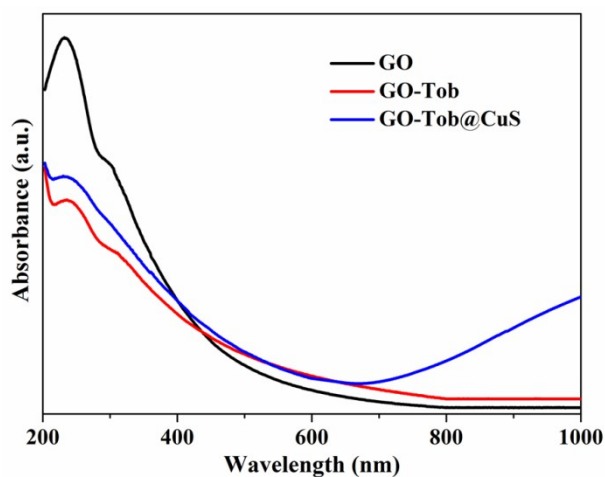

**Fig. S1** UV-vis-NIR spectra of the GO, GO-Tob and GO-Tob@CuS.

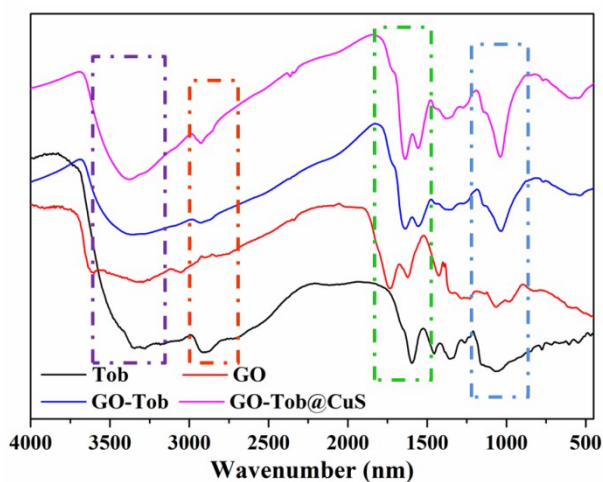

**Fig. S2** The comparative FTIR spectra of Tob, GO, GO-Tob and GO-Tob@CuS.

As shown in Figure S2, for GO, numerous peaks were appeared due to the stretching and bending modes of various functional groups such as O-H stretching mode (3300-3400  $\text{cm}^{-1}$ ), C=O stretching mode (1700-1750  $\text{cm}^{-1}$ ), O-H bending mode (1380-1400  $\text{cm}^{-1}$ ), C-O (epoxy) stretching mode (1150-1220  $\text{cm}^{-1}$ ), and C-O (alkoxy) stretching mode (980-1020  $\text{cm}^{-1}$ ). The peak from 1580 to 1630  $\text{cm}^{-1}$  was responsible for the unoxidized graphitic domains. For Go-Tob, the peaks at 3000-3500 and 1520-1650  $\text{cm}^{-1}$  were attributed to N-H stretching and bending modes, respectively. The signal at 1360-1420  $\text{cm}^{-1}$  was corresponded to the N-H vibrational mode.

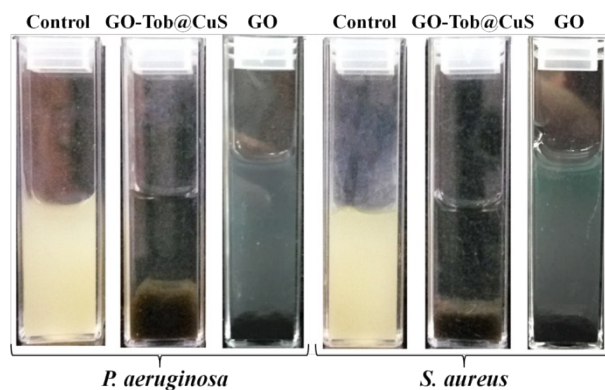

**Fig. S3** The photographs of bacterial suspensions before and after treatment of GO-Tob@CuS nanocomposites.

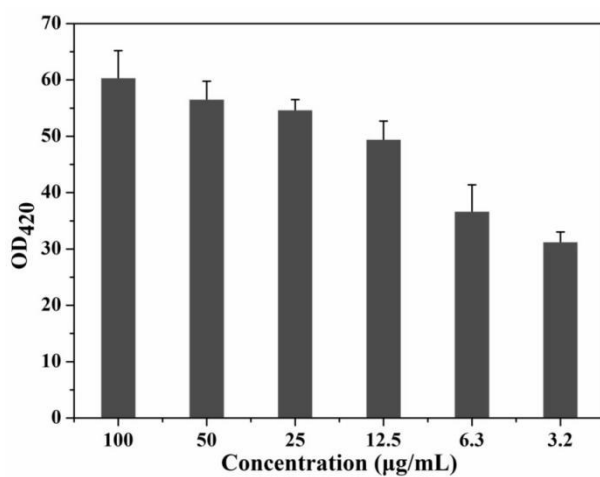

**Fig. S4** The absorption of ONP in solution containing different concentrations of GO-Tob@CuS.

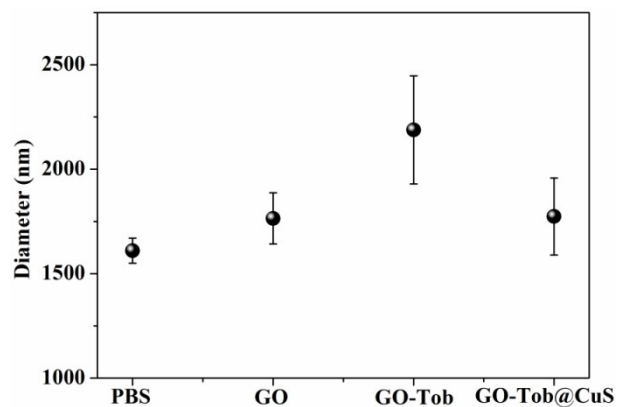

**Fig. S5** The average diameters of alginate solution before and after being treated with GO, GO-Tob and GO-Tob@CuS.

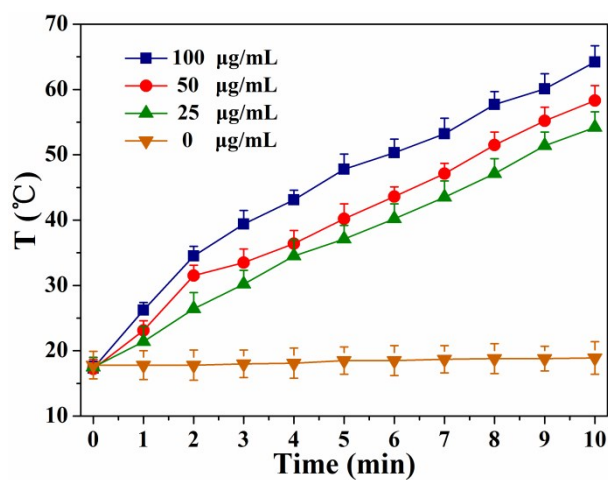

**Fig. S6** Temperature changes of GO-Tob@CuS in cell-culture medium with different concentrations irradiated by NIR laser.

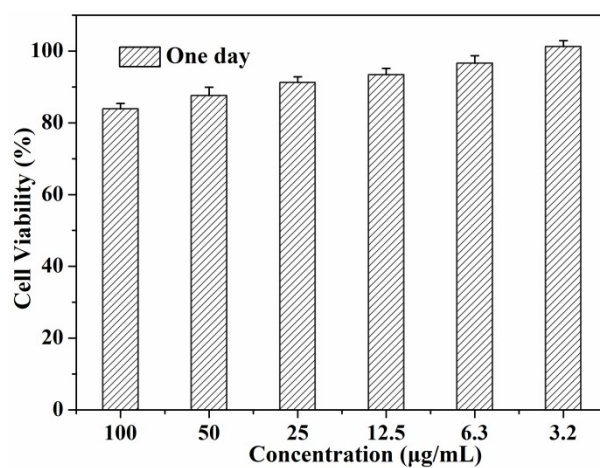

**Fig S7** Relative viabilities of NIH 3T3 cells after being treated with GO-Tob@CuS nanocomposites at different concentrations for 24 h.

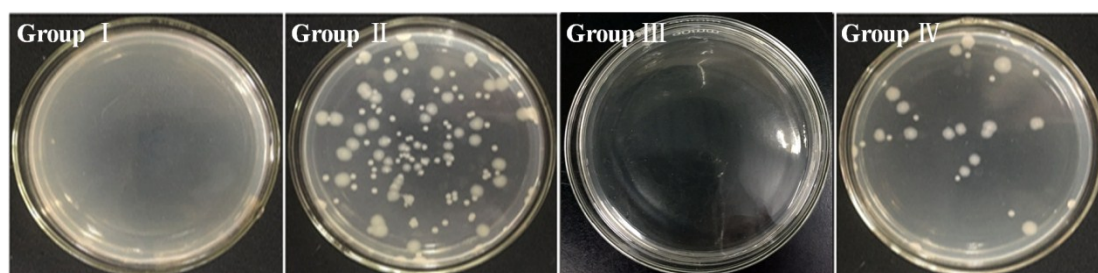

**Fig. S8** Photographs of bacterial cultures from the skin tissue of bacterial infected rats.
